# Supplementary material
Source: PubMed Central journal article supplement (PMC5165679)
Supplement: Supp_Fig1.pdf [file Supp_Fig1.pdf]

## Supplementary Data

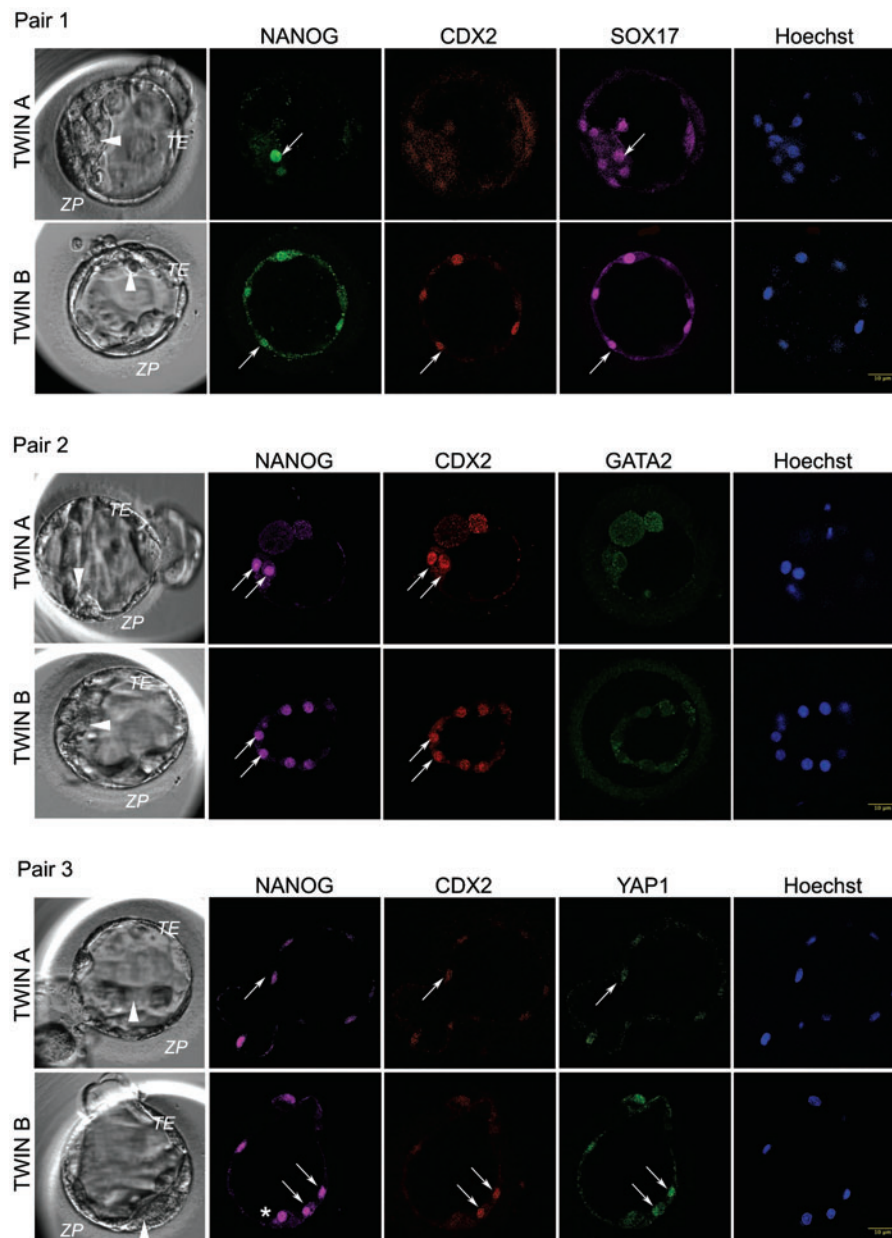

**SUPPLEMENTARY FIG. S1.** Immunostaining of lineage markers in twin embryos, pair 1–3, used in the experiment. Their expression in blastocysts derived from split embryos is frequently nonspecific. In addition, the embryos have poorly developed ICM (*arrowheads*). Pair 1. *Green*: ICM marker NANOG. *Red*: TE marker CDX2. *Magenta*: primitive endoderm marker SOX17. *Blue*: DNA dye Hoechst 33342. The *arrows* in Twin A point to cells with dual expression of NANOG and SOX17, whereas in Twin B indicate cells with triple expression of NANOG, CDX2, and SOX17. Pair 2. *Magenta*: NANOG. *Red*: CDX2. *Green*: TE marker GATA2. *Blue*: DNA dye Hoechst 33342. Expression of GATA2 is not detected. The *arrows* point to cells with dual expression of NANOG and CDX2. Pair 3. *Magenta*: NANOG. *Red*: CDX2. *Green*: TE marker YAP1. *Blue*: DNA dye Hoechst 33342. The *arrows* indicate cells with triple expression of NANOG, CDX2, and YAP1. ICM, inner cell mass; TE, trophoblast.
