# Supplementary material
Source: PubMed Central journal article supplement (PMC5165679)

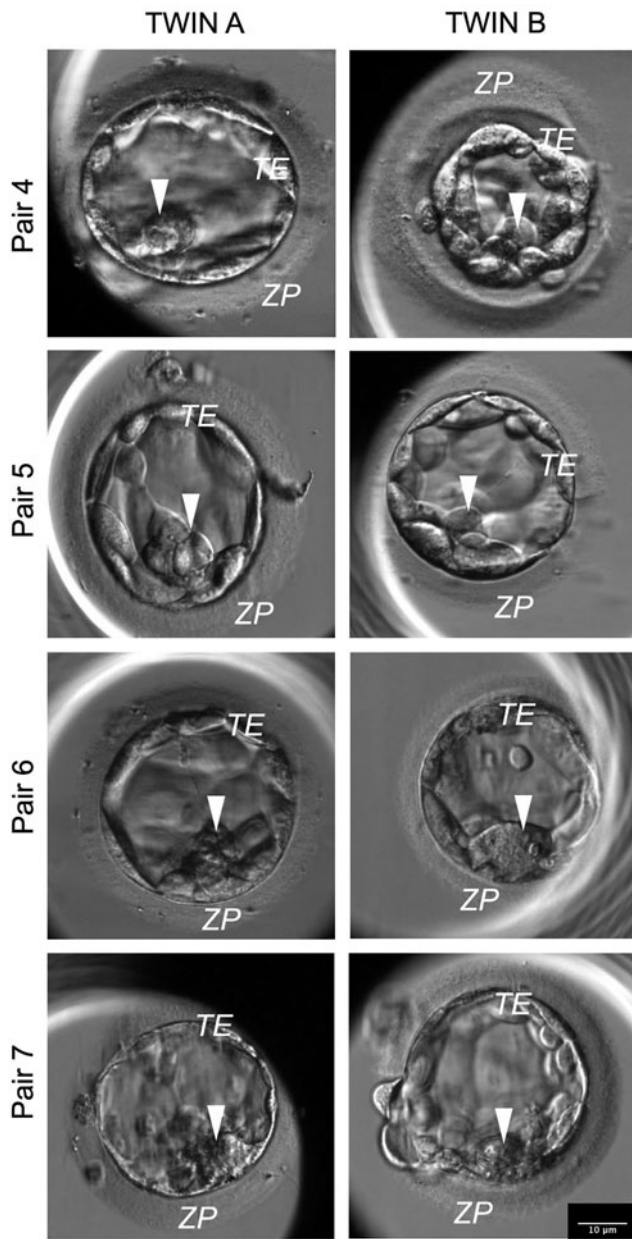

**SUPPLEMENTARY FIG. S2.** Twin embryos, pair 4–7, used in the experiment.

Supplement: Supp_Fig2.pdf [file Supp_Fig2.pdf]
